# Supplementary material for: Coordinate MicroRNA-Mediated Regulation of Protein Complexes in Prostate Cancer
Source: PubMed Central journal article supplement (PMC3877262; doi:10.1371/journal.pone.0084261), 2013-12-31
Supplement: pone.0084261.s002.pdf [file pone.0084261.s002.pdf]

## Coordinate microRNA-mediated regulation of protein complexes in prostate cancer

Mohammed alshalalfa, Gary Bader, Tarek Bismar, Reda Alhajj

Table S1: A list of the most significant protein complexes that were predicted to be dysregulated by miRNAs in prostate cancer. In each complex we show the CORUM ID, Complex Name, Protein members and the miRNAs targeting the genes encoding the proteins.

| CORUM ID: 4089                    |                                  |
|-----------------------------------|----------------------------------|
| Complex Name: SMAD6-HOXC8 complex |                                  |
| Complex protein members           | miRNAs targeting protein members |
| HOXC8                             | hsa-miR-196                      |
| HOXC8                             | hsa-miR-196a                     |
| HOXC8                             | hsa-miR-196b                     |
| SMAD6                             | hsa-miR-520h                     |

| CORUM ID :3959                 |                                  |
|--------------------------------|----------------------------------|
| Complex Name: SMAD3-SMAD4-cSKI |                                  |
| Complex protein members        | miRNAs targeting protein members |
| SKI                            | hsa-miR-155                      |
| SKI                            | hsa-miR-195                      |
| SMAD4                          | hsa-miR-17                       |
| SMAD4                          | hsa-miR-18a                      |
| SMAD4                          | hsa-miR-19a                      |
| SMAD4                          | hsa-miR-20a                      |
| SMAD4                          | hsa-miR-26a                      |
| SMAD4                          | hsa-miR-483-3p                   |
| SMAD4                          | hsa-miR-92a                      |

| CORUM ID: 3740                                   |                                  |
|--------------------------------------------------|----------------------------------|
| Complex Name: SKI-SMAD3-SMAD4 pentameric complex |                                  |
| Complex protein members                          | miRNAs targeting protein members |
| SKI                                              | hsa-miR-155                      |
| SKI                                              | hsa-miR-195                      |
| SMAD4                                            | hsa-miR-17                       |
| SMAD4                                            | hsa-miR-18a                      |
| SMAD4                                            | hsa-miR-19a                      |
| SMAD4                                            | hsa-miR-20a                      |
| SMAD4                                            | hsa-miR-26a                      |

|       |                |
|-------|----------------|
| SMAD4 | hsa-miR-483-3p |
| SMAD4 | hsa-miR-92a    |

|                                          |                                  |
|------------------------------------------|----------------------------------|
| CORUM ID: 2447                           |                                  |
| Complex Name: ITGA9-ITGB1-ADAM12 complex |                                  |
| Complex protein members                  | miRNAs targeting protein members |
| ITGB1                                    | hsa-miR-124                      |
| ITGB1                                    | hsa-miR-183                      |
| ITGA9                                    | hsa-miR-194                      |
| ADAM12                                   | hsa-miR-29b                      |

|                                 |                                  |
|---------------------------------|----------------------------------|
| CORUM ID: 1539                  |                                  |
| Complex Name: G protein complex |                                  |
| Complex protein members         | miRNAs targeting protein members |
| RAF1                            | hsa-miR-125b                     |
| RAF1                            | hsa-miR-7                        |

|                            |                                  |
|----------------------------|----------------------------------|
| CORUM ID: 5589             |                                  |
| Complex Name: LINC complex |                                  |
| Complex protein members    | miRNAs targeting protein members |
| RBL1                       | hsa-miR-106b                     |
| RBL1                       | hsa-miR-17                       |
| RBL1                       | hsa-miR-20a                      |

|                                        |                                  |
|----------------------------------------|----------------------------------|
| CORUM ID: 2590                         |                                  |
| Complex Name: FOXO1-FHL2-SIRT1 complex |                                  |
| Complex protein members                | miRNAs targeting protein members |
| FOXO1                                  | hsa-miR-153                      |
| FOXO1                                  | hsa-miR-182                      |
| FOXO1                                  | hsa-miR-183                      |
| FOXO1                                  | hsa-miR-186                      |
| FOXO1                                  | hsa-miR-27a                      |
| FOXO1                                  | hsa-miR-9                        |
| FOXO1                                  | hsa-miR-96                       |
| SIRT1                                  | hsa-miR-132                      |
| SIRT1                                  | hsa-miR-216a                     |
| SIRT1                                  | hsa-miR-217                      |
| SIRT1                                  | hsa-miR-34a                      |

|                                  |                                  |
|----------------------------------|----------------------------------|
| CORUM ID: 695                    |                                  |
| Complex Name: SIN3A-HDAC complex |                                  |
| Complex protein members          | miRNAs targeting protein members |
| HDAC1                            | hsa-miR-410                      |
| HDAC2                            | hsa-miR-142-5p                   |
| SIN3A                            | hsa-miR-138                      |
| SIN3A                            | hsa-miR-144                      |
| SIN3A                            | hsa-miR-149                      |
| SIN3A                            | hsa-miR-183                      |
| SIN3A                            | hsa-miR-204                      |
| SIN3A                            | hsa-miR-330                      |
| SIN3A                            | hsa-miR-431                      |
| SIN3A                            | hsa-miR-493-5p                   |
| SIN3A                            | hsa-miR-9                        |
| SAP30                            | hsa-miR-30                       |
| RBBP7                            | hsa-miR-101                      |
| RBBP7                            | hsa-miR-144                      |
| RBBP7                            | hsa-miR-181                      |
| RBBP7                            | hsa-miR-186                      |
| RBBP7                            | hsa-miR-199a*                    |
| RBBP7                            | hsa-miR-20                       |
| RBBP7                            | hsa-miR-381                      |
| RBBP7                            | hsa-miR-539                      |
| RBBP7                            | hsa-miR-543                      |
| RBBP7                            | hsa-miR-544                      |
| RBBP7                            | hsa-miR-93                       |
| RBBP4                            | hsa-miR-133                      |
| RBBP4                            | hsa-miR-185                      |
| ARID4B                           | hsa-let-7g                       |
| ARID4B                           | hsa-let-7i                       |
| ARID4B                           | hsa-miR-101                      |
| ARID4B                           | hsa-miR-106b                     |
| ARID4B                           | hsa-miR-128                      |
| ARID4B                           | hsa-miR-128a                     |
| ARID4B                           | hsa-miR-128b                     |
| ARID4B                           | hsa-miR-130                      |
| ARID4B                           | hsa-miR-130a                     |
| ARID4B                           | hsa-miR-130b                     |
| ARID4B                           | hsa-miR-137                      |
| ARID4B                           | hsa-miR-142-5p                   |
| ARID4B                           | hsa-miR-144                      |

|        |                |
|--------|----------------|
| ARID4B | hsa-miR-17-5p  |
| ARID4B | hsa-miR-183    |
| ARID4B | hsa-miR-19     |
| ARID4B | hsa-miR-193a   |
| ARID4B | hsa-miR-193b   |
| ARID4B | hsa-miR-199a*  |
| ARID4B | hsa-miR-19a    |
| ARID4B | hsa-miR-19b    |
| ARID4B | hsa-miR-20     |
| ARID4B | hsa-miR-200b   |
| ARID4B | hsa-miR-20a    |
| ARID4B | hsa-miR-20b    |
| ARID4B | hsa-miR-218    |
| ARID4B | hsa-miR-30     |
| ARID4B | hsa-miR-301    |
| ARID4B | hsa-miR-302a   |
| ARID4B | hsa-miR-302b*  |
| ARID4B | hsa-miR-302c*  |
| ARID4B | hsa-miR-30a-5p |
| ARID4B | hsa-miR-30b    |
| ARID4B | hsa-miR-30c    |
| ARID4B | hsa-miR-30d    |
| ARID4B | hsa-miR-30e-5p |
| ARID4B | hsa-miR-328    |
| ARID4B | hsa-miR-34     |
| ARID4B | hsa-miR-34a    |
| ARID4B | hsa-miR-34b    |
| ARID4B | hsa-miR-34c    |
| ARID4B | hsa-miR-370    |
| ARID4B | hsa-miR-374    |
| ARID4B | hsa-miR-377    |
| ARID4B | hsa-miR-378    |
| ARID4B | hsa-miR-381    |
| ARID4B | hsa-miR-409-5p |
| ARID4B | hsa-miR-410    |
| ARID4B | hsa-miR-452    |
| ARID4B | hsa-miR-493-5p |
| ARID4B | hsa-miR-494    |
| ARID4B | hsa-miR-495    |
| ARID4B | hsa-miR-496    |
| ARID4B | hsa-miR-505    |

|        |            |
|--------|------------|
| ARID4B | hsa-miR-93 |
|--------|------------|
