# Supplementary material for: Coordinate MicroRNA-Mediated Regulation of Protein Complexes in Prostate Cancer
Source: PubMed Central journal article supplement (PMC3877262; doi:10.1371/journal.pone.0084261), 2013-12-31
Supplement: pone.0084261.s003.pdf [file pone.0084261.s003.pdf]

Coordinate microRNA-mediated regulation of protein complexes in prostate cancer  
 Mohammed alshalalfa, Gary Bader, Tarek Bismar, Reda Alhajj

Table S2: This table lists the miRNAs that play a role in prostate cancer progression based on our analyzed expression data sets; either prostate cell lines or prostate tissue. It also lists the experimentally verified targets for some of them that we extracted from literature.

| miRNA      | Known targets in prostate context (cell line or tissue) | Reference                | Function         | Experimentally verified target pathways                  |
|------------|---------------------------------------------------------|--------------------------|------------------|----------------------------------------------------------|
| miRNA-221  | P27 <sup>Kip1</sup><br>(CDKN1B)                         | 1,8                      | Oncogene         | Development and metastasis of PCa, AR-mediated signaling |
| miRNA-222  | P27 <sup>Kip1</sup><br>(CDKN1B)                         | 1,8                      | Oncogene         | Development and metastasis of PCa, AR-mediated signaling |
| miRNA-21   | MARCKS<br>PDCD4<br>TPM1<br>BMPRII                       | 1,8<br>1,8<br>1,8<br>3,8 | Oncogene         | Development and metastasis of PCa , AR-mediate signaling |
| miRNA-125b | BAK1<br>EIF4EBP1                                        | 1,8<br>1                 | Oncogene         | cell proliferation                                       |
| miRNA-101  | EZH2                                                    | 1,3,8                    | Tumor suppressor | Cell growth and invasiveness                             |
| miRNA-126* | Prostein (SLC45A3)<br>EGFL7                             | 1,8<br>2                 | Tumor suppressor | VEGF signaling and vessel development                    |
| miRNA-146a | ROCK1                                                   | 1,3                      | Tumor suppressor | HA/Rock1 pathway                                         |
| miRNA-330  | E2F1                                                    | 3                        | Tumor suppressor | AKT signaling                                            |
| miRNA-200a | ZEB1<br>ZEB2                                            | 3<br>3                   | Tumor suppressor | epithelial to mesenchymal transition                     |
| miRNA-200b | ZEB1                                                    | 3                        | Tumor            | epithelial to                                            |

|              |                            |                   |                  |                                      |
|--------------|----------------------------|-------------------|------------------|--------------------------------------|
|              | ZEB2                       | 3                 | suppressor       | mesenchymal transition               |
| miRNA-429    |                            | 3                 | Tumor suppressor | epithelial to mesenchymal transition |
| miRNA-200c   | ZEB1<br>ZEB2               | 3,8               |                  |                                      |
| miRNA-141    |                            | 3                 |                  |                                      |
| miRNA-34a    | P53<br>CDK6<br>SIRT1       | 3,8<br>3,8<br>3,8 | Tumor suppressor | AR, p53 pathway                      |
| miRNA-17-5p  |                            | 3                 | Tumor suppressor |                                      |
| miRNA-17-3p  | VIM                        | 3                 | Tumor suppressor |                                      |
| miRNA-193b   |                            | 8                 |                  |                                      |
| miRNA-92     |                            | 3                 |                  |                                      |
| miRNA-106a   |                            | 3,8               |                  |                                      |
| miRNA-155    |                            | 3,8               |                  |                                      |
| miRNA-338    |                            | 3                 |                  |                                      |
| miRNA-126    |                            | 3                 |                  |                                      |
| miRNA-181b   |                            | 3,8               |                  |                                      |
| miRNA-181c   |                            | 3                 |                  |                                      |
| miRNA-224    |                            | 3,8               |                  |                                      |
| miRNA-23b    | c-MYC<br>GLS               | 3                 |                  |                                      |
| miRNA-100    | SMARCA5<br>SMARCD1<br>mTOR | 3,6               |                  |                                      |
| miRNA-145    | ICP4<br>MYO6               | 3,4,8             |                  |                                      |
| miRNA-15a    | BCL2<br>CCND1<br>WNT3A     | 3                 | Tumor suppressor | VEGF signaling                       |
| miRNA-16     | BCL2<br>CCND1<br>WNT3A     | 3,8               | Tumor suppressor | VEGF signaling                       |
| miRNA-23a    | c-MYC<br>GLS               | 3                 | Tumor suppressor |                                      |
| miRNA-449a   | HDAC1                      | 3                 | Tumor suppressor |                                      |
| miRNA-331-3p | CDCA5<br>KIF23<br>ERBB2    | 3<br>3<br>3,8     | Tumor suppressor |                                      |
| miRNA-373    | CD44                       | 3                 | Tumor suppressor |                                      |

|              |                                            |                   |                  |                               |
|--------------|--------------------------------------------|-------------------|------------------|-------------------------------|
| miRNA-520c   | CD44                                       | 3                 | Tumor suppressor |                               |
| miRNA-205    | ZEB2<br>ERBB3<br>PRKCE                     | 3,8<br>3,8<br>3,8 | Tumor suppressor |                               |
| miRNA-143    | ERK5<br>MYO6<br>ICP4                       | 3,8<br>8<br>8     | Tumor suppressor |                               |
| miRNA-20a    | E2F1<br>E2F2<br>E2F3                       | 3<br>3<br>3       | Oncogene         |                               |
| miRNA-106b   | E2F1<br>CDKN1A                             | 3<br>3            | Oncogene         |                               |
| miRNA-32     | Bim1<br>BCL2                               | 3                 | Oncogene         |                               |
| miRNA-218    |                                            | 3                 |                  |                               |
| miRNA-let7c  |                                            | 3,8               |                  |                               |
| miRNA-1      | HDAC4<br>XPO6<br>Notch3                    | 4                 | Tumor suppressor | Inhibiting cell proliferation |
| miRNA-206    | HDAC4                                      | 4                 |                  |                               |
| miRNA-133a   |                                            | 4                 |                  |                               |
| miRNA-182    | SLC39A1                                    | 5                 |                  |                               |
| miRNA-183    |                                            | 5                 |                  |                               |
| miRNA-96     |                                            | 5                 |                  |                               |
| miRNA-99a    | SMARCA5<br>SMARCD1<br>mTOR(FRAP1)<br>KLK3  | 6<br>6<br>6       |                  |                               |
| miRNA-99b    | SMARCA5<br>SMARCD1<br>mTOR (FRAP1)<br>KLK3 | 6                 |                  |                               |
| miRNA-204    |                                            | 7                 |                  |                               |
| miRNA-210    |                                            | 7                 |                  |                               |
| miRNA-451    |                                            | 7                 |                  |                               |
| mi-RNA425-5p |                                            | 7                 |                  |                               |

\*: indicates that the miRNA is predicted to have high influence on target partners based on miRNA-target influence network

Reference:

[1] Pang Y , Young CY and Yuan H, MicroRNAs and prostate cancer, Acta Biochim Biophys Sin, 2010, 42:363-369

- [2] Nikolic I, Plate K, Schmidt M, EGFL7 meets miRNA-126: an angiogenesis alliance, *Vascular Cell*, 2010, 2:9
- [3] Saini S, Majid S, and Dahiya R, Diet, microRNAs and prostate cancer, *Pharm Res*, 2010, 27:1014-1026
- [4] Hudson PS, et al, MicroRNA-1 is a candidate tumor suppressor and prognostic marker in human prostate cancer, *Nucleic Acids Research*, 2011, 1-15
- [5] Mihelich BL, et al, miR-183-96-182 cluster is overexpressed in prostate tissue and regulates zinc homeostasis in prostate cells, *The J.of Biol Chem*, 2011, 296:44503-44511
- [6] Sun D, et al, miR-99 family of microRNAs suppresses the expression of prostate-specific antigen and prostate cancer cell proliferation, *Cancer Research*, 2011, 71:1313-1324
- [7] Martens-Uzunova ES, et al, Diagnostic and prognostic signature from the small non-coding RNA transcriptome in prostate cancer, *Oncogene*, 2012, 31:978-991
- [8] Xu J et al, Prioritizing candidate disease miRNAs by topological features in the miRNA target-dysregulated network: case study of prostate cancer, *Molecular Cancer Therapeutics*, 2011,10,1857-1866
